# Supplementary material for: Genome-Wide Characterization of Menin-Dependent H3K4me3 Reveals a Specific Role for Menin in the Regulation of Genes Implicated in MEN1-Like Tumors
Source: PLoS One. 2012 May 30;7(5):e37952. doi: 10.1371/journal.pone.0037952 (PMC3364203; doi:10.1371/journal.pone.0037952)
Supplement: Table S2 — Genes differentially expressed in menin-null vs wild-type pancreatic islet-like endocrine cells. (XLSX) [file pone.0037952.s004.xlsx]

## Sheet: Sheet2
Table S2. Genes differentially expressed in menin-null vs wild-type PILECs (≥2 fold, p<0.005)
Gene Symbol	Gene Title	Fold change
Hoxb6	homeo box B6	-12.7936
Hoxa9	homeo box A9	-9.43261
Ttr	transthyretin	-9.11002
Hoxb5	homeo box B5	-7.26437
Hoxb3	homeo box B3	-7.16336
Hoxc8	homeo box C8	-6.99762
Hoxb2	homeo box B2	-6.9874
Nxf3	nuclear RNA export factor 3	-6.64828
Actc1	actin, alpha, cardiac	-5.8904
Adipoq	adiponectin, C1Q and collagen domain containing	-5.03911
Hoxa5	homeo box A5	-4.99885
Hoxb7	homeo box B7	-4.85627
Lbxcor1	ladybird homeobox 1 homolog (Drosophila) corepressor 1	-4.79592
1700109F18Rik	RIKEN cDNA 1700109F18 gene	-4.73443
Myog	myogenin	-4.66907
Nap1l5	nucleosome assembly protein 1-like 5	-4.55292
4930519N06Rik	RIKEN cDNA 4930519N06 gene	-4.52925
Men1	multiple endocrine neoplasia 1	-4.49005
Ren1	renin 1 structural	-3.85753
Tnnt2	troponin T2, cardiac	-3.83961
Hoxb9	homeo box B9	-3.80209
Myh3	myosin, heavy polypeptide 3, skeletal muscle, embryonic	-3.59499
Rspo1	R-spondin homolog (Xenopus laevis)	-3.44292
Pou4f2	POU domain, class 4, transcription factor 2	-3.44125
Slc38a4	solute carrier family 38, member 4	-3.38422
Zic4	zinc finger protein of the cerebellum 4	-3.34175
Myl4	myosin, light polypeptide 4	-3.3338
Nov	nephroblastoma overexpressed gene	-3.30828
Tnni1	troponin I, skeletal, slow 1	-3.28628
Zic3	zinc finger protein of the cerebellum 3	-3.26983
Hoxc4	homeo box C4	-3.26114
Hoxd3	homeo box D3	-3.25061
Efemp1	epidermal growth factor-containing fibulin-like extracellular matrix protein 1	-3.24164
Myh8	myosin, heavy polypeptide 8, skeletal muscle, perinatal	-3.21471
Tpm2	tropomyosin 2, beta	-3.20954
Hoxc6	homeo box C6	-3.07029
1500012D20Rik	RIKEN cDNA 1500012D20 gene	-3.06693
AI448005	expressed sequence AI448005	-3.05565
Mylpf	myosin light chain, phosphorylatable, fast skeletal muscle	-3.03474
Lhx9	LIM homeobox protein 9	-2.99837
Crabp1	cellular retinoic acid binding protein I	-2.98906
Tnnc1	troponin C, cardiac/slow skeletal	-2.98627
Cnpy1	canopy 1 homolog (zebrafish)	-2.95563
Pdgfrl	platelet-derived growth factor receptor-like	-2.93309
6330527O06Rik	RIKEN cDNA 6330527O06 gene	-2.89508
Barhl1	BarH-like 1 (Drosophila)	-2.86086
Eya4	eyes absent 4 homolog (Drosophila)	-2.86043
Rspo3	R-spondin 3 homolog (Xenopus laevis)	-2.76658
Tnnc2	troponin C2, fast	-2.74311
Igfbpl1	insulin-like growth factor binding protein-like 1	-2.69415
En2	engrailed 2	-2.68901
Hoxb4	homeo box B4	-2.67032
Prr6	proline-rich polypeptide 6	-2.66685
Mybph	myosin binding protein H	-2.64514
Wnt8b	wingless related MMTV integration site 8b	-2.62937
Hoxd10	homeo box D10	-2.62886
Aspn	asporin	-2.61071
Cd1d1	CD1d1 antigen	-2.60843
Otx2	orthodenticle homolog 2 (Drosophila)	-2.59787
Actn2	actinin alpha 2	-2.58057
Prdm5	PR domain containing 5	-2.57695
Hoxa2	homeo box A2	-2.57631
Fabp4	fatty acid binding protein 4, adipocyte	-2.54538
Moxd1	monooxygenase, DBH-like 1	-2.5409
Pou3f4	POU domain, class 3, transcription factor 4	-2.49404
Synpo2l	synaptopodin 2-like	-2.48549
BC055107	cDNA sequence BC055107	-2.48247
LOC553095	hypothetical LOC553095	-2.47156
Dcc	deleted in colorectal carcinoma	-2.39295
Col14a1	collagen, type XIV, alpha 1	-2.37359
Mab21l1	mab-21-like 1 (C. elegans)	-2.35503
Tnnt3	troponin T3, skeletal, fast	-2.30554
Adfp	adipose differentiation related protein	-2.30462
Adm	adrenomedullin	-2.29938
Neurog2	neurogenin 2	-2.29193
Zic1	zinc finger protein of the cerebellum 1	-2.28423
Cdon	cell adhesion molecule-related/down-regulated by oncogenes	-2.27646
Lbx1	ladybird homeobox homolog 1 (Drosophila)	-2.27629
Cth	cystathionase (cystathionine gamma-lyase)	-2.25766
Magohb	mago-nashi homolog B (Drosophila)	-2.25655
Tal2	T-cell acute lymphocytic leukemia 2	-2.2545
Hoxa3	homeo box A3	-2.22967
Cd302	CD302 antigen	-2.21565
Meis1	Meis homeobox 1	-2.21564
Tcfap2d	transcription factor AP-2, delta	-2.21059
Ptpmt1	protein tyrosine phosphatase, mitochondrial 1	-2.21
Lpl	lipoprotein lipase	-2.20895
Spg3a	spastic paraplegia 3A homolog (human)	-2.19044
D7Ertd715e	DNA segment, Chr 7, ERATO Doi 715, expressed	-2.18709
Neurog1	neurogenin 1	-2.18317
LOC100045988	similar to OPR	-2.18312
1500015O10Rik	RIKEN cDNA 1500015O10 gene	-2.17505
Lhx2	LIM homeobox protein 2	-2.16262
Ebf1	early B-cell factor 1	-2.16182
Nhlh2	nescient helix loop helix 2	-2.15543
Gli3	GLI-Kruppel family member GLI3	-2.15022
Pax3	paired box gene 3	-2.14715
Dbx1	developing brain homeobox 1	-2.13482
LOC552873	hypothetical LOC552873	-2.13403
6430537K16Rik	RIKEN cDNA 6430537K16 gene	-2.12685
Igf2bp1	insulin-like growth factor 2 mRNA binding protein 1	-2.11885
Cryab	crystallin, alpha B	-2.10266
Col8a2	collagen, type VIII, alpha 2	-2.10016
Sfrp2	secreted frizzled-related protein 2	-2.08707
Col4a5	collagen, type IV, alpha 5	-2.07329
Gbx2	gastrulation brain homeobox 2	-2.06221
Car3	carbonic anhydrase 3	-2.05587
Tm4sf1	transmembrane 4 superfamily member 1	-2.05388
Fgfbp3	fibroblast growth factor binding protein 3	-2.04878
Hspb1	heat shock protein 1	-2.0441
Vav3	vav 3 oncogene	-2.02936
Mdfic	MyoD family inhibitor domain containing	-2.01273
Nanog	Nanog homeobox	-2.00872
Pou4f1	POU domain, class 4, transcription factor 1	-2.00737
Dppa5a	developmental pluripotency associated 5A	-2.00413
Phf21b	PHD finger protein 21B	-2.00183
Slc6a1	solute carrier family 6 (neurotransmitter transporter, GABA), member 1	2.01558
Gpr17	G protein-coupled receptor 17	2.02336
Thy1	thymus cell antigen 1, theta	2.02459
Pthr1	parathyroid hormone receptor 1	2.0291
Ctsh	cathepsin H	2.05129
Cpne4	copine IV	2.05554
Plp1	proteolipid protein (myelin) 1	2.06393
A930034L06Rik	RIKEN cDNA A930034L06 gene	2.0857
4932702M13Rik	RIKEN cDNA 4932702M13 gene	2.08787
Lamb1-1	laminin B1 subunit 1	2.09833
Syn2	synapsin II	2.13214
Zfp179	zinc finger protein 179	2.13876
Eef1a2	eukaryotic translation elongation factor 1 alpha 2	2.1527
6030405A18Rik	RIKEN cDNA 6030405A18 gene	2.15399
Prkar1b	protein kinase, cAMP dependent regulatory, type I beta	2.15914
Sox7	SRY-box containing gene 7	2.16674
Car4	carbonic anhydrase 4	2.17289
Scg2	secretogranin II	2.18604
Slc35d3	solute carrier family 35, member D3	2.19342
Aqp4	aquaporin 4	2.20132
AI427515	expressed sequence AI427515	2.26461
Tmem130	transmembrane protein 130	2.27181
Ube1y1	ubiquitin-activating enzyme E1, Chr Y 1	2.29262
Fxyd7	FXYD domain-containing ion transport regulator 7	2.37653
Gata4	GATA binding protein 4	2.38379
C1s	complement component 1, s subcomponent	2.38584
Gda	guanine deaminase	2.39264
Lamc1	laminin, gamma 1	2.403
Gfap	glial fibrillary acidic protein	2.50222
Glipr1	GLI pathogenesis-related 1 (glioma)	2.50766
Olig1	oligodendrocyte transcription factor 1	2.58196
Sox17	SRY-box containing gene 17	2.59691
Fxyd3	FXYD domain-containing ion transport regulator 3	2.60073
Hpcal4	hippocalcin-like 4	2.62771
Epas1	endothelial PAS domain protein 1	2.65404
Col4a1	collagen, type IV, alpha 1	2.69595
Mbp	myelin basic protein	2.75647
Aqp8	aquaporin 8	2.76413
Bcas1	breast carcinoma amplified sequence 1	2.82349
A530057A03Rik	RIKEN cDNA A530057A03 gene	3.08308
Col4a2	collagen, type IV, alpha 2	3.13485
Tinagl	tubulointerstitial nephritis antigen-like	3.33857
S100g	S100 calcium binding protein G	3.76577
Gkn2	gastrokine 2	4.06235
Pga5	pepsinogen 5, group I	4.24876
Pcdh21	protocadherin 21	4.54582
Serpina3n	serine (or cysteine) peptidase inhibitor, clade A, member 3N	4.75803
Srgn	serglycin	5.30031
Lama1	laminin, alpha 1	5.39826
Ctgf	connective tissue growth factor	6.49233
Igfbp1	insulin-like growth factor binding protein 1	7.88038
