# Supplementary material for: Genome-Wide Characterization of Menin-Dependent H3K4me3 Reveals a Specific Role for Menin in the Regulation of Genes Implicated in MEN1-Like Tumors
Source: PLoS One. 2012 May 30;7(5):e37952. doi: 10.1371/journal.pone.0037952 (PMC3364203; doi:10.1371/journal.pone.0037952)
Supplement: Table S3 — Genomic regions with differential H3K4me3 in menin-null vs wild-type mESCs. (XLSX) [file pone.0037952.s005.xlsx]

## Sheet: Table S1
Table S1. Genomic regions with differential H3K4me3 in menin-null vs wild-type mESCs (>2-fold change)
Fold change	chromosome	start	end	nearest_gene_or_locus	refseq_gene_ID	strand	TSS
-16.57	chr12	110779201	110780800	Meg3	NR_027652	+	110779205
-12.51	chr12	110765801	110767000
-8.71	chr6	30688001	30689000	Mest	NM_008590	+	30688062
-6.57	chr10	44160601	44161800
-5.21	chr12	111932601	111933800	Hsp90aa1	NM_010480	-	111934605
-2.87	chr4	33009201	33010200	Ankrd6	NM_080471	-	33010480
-2.61	chr8	122859601	122860600
-2.28	chr13	23523401	23524600
-2.25	chr4	34499001	34500000	Akirin2	NM_001007589	+	34497863
-2.16	chr8	107902801	107903800
-2.08	chr11	3066601	3068200
-2.06	chr19	36909601	36910600	Tnks2	NM_001163635	+	36908721
2	chr11	77306801	77308000	Git1	NM_001004144	+	77306913
2	chr7	19894201	19895200	Fosb	NM_008036	-	19895394
2.03	chr4	139801001	139803000	Igsf21	NM_198610	-	139802726
2.05	chr17	35186601	35187600
2.05	chr15	74785801	74787000	Ly6e	NM_001164040	+	74785535
2.06	chr7	148140001	148141600	Ifitm2	NM_030694	-	148141860
2.1	chr2	181326801	181327800
2.1	chr17	24826201	24827200	Syngr3	NM_011522	-	24826894
2.1	chr8	73289401	73290400	Ifi30	NM_023065	-	73290562
2.11	chr8	106965601	106966600	Dync1li2	NM_001013380	-	106966947
2.11	chr7	30092401	30093400
2.11	chr17	45737601	45738800	Gm7325	NM_001177470	-	45738864
2.14	chr17	88196401	88197400	Kcnk12	NM_199251	-	88197334
2.15	chr9	94437401	94438400	1190002N15Rik	NM_001033145	-	94438500
2.15	chr1	75501601	75502600	Obsl1	NM_178884	-	75503027
2.15	chr7	20407201	20408200	Bcl3	NM_033601	-	20408104
2.16	chr4	137951201	137952200	Fam43b	NM_001081672	-	137952373
2.16	chr8	116963401	116964600	Wwox	NM_019573	+	116963551
2.22	chr16	35659601	35660800
2.22	chr5	114933601	114936600
2.24	chr7	126137201	126138200	Gprc5b	NM_001195774	-	126138725
2.25	chr7	133838001	133839200	Slx1b	NM_029420	-	133839297
2.25	chr4	154009001	154011000	Prdm16	NM_001177995	-	154010982
2.27	chr7	20092401	20093400	Bloc1s3	NM_177692	-	20093680
2.32	chr2	130101801	130103000
2.4	chr13	98254801	98255800
2.47	chr8	124429601	124430800	Slc7a5	NM_011404	-	124431586
2.51	chr2	179709801	179711000	Taf4a	NM_001081092	-	179711351
2.56	chr19	5662801	5663800	Sipa1	NM_001164481	-	5663707
2.56	chr4	133188401	133189400	Zdhhc18	NM_001017968	-	133189344
2.56	chr7	51885001	51886000
2.58	chr19	45132801	45133800
2.64	chr2	10285201	10286400
2.64	chr7	31250801	31253200
2.73	chr14	47009801	47011000
2.8	chr17	30023801	30024800	Mdga1	NM_001081160	-	30024827
2.88	chr19	6999201	7000400	1700019N12Rik	NM_001039494	-	6999870
2.9	chr17	35972001	35973000
3.03	chr12	106460001	106461000	Tcl1	NM_009337	-	106460947
3.13	chr14	55191601	55192600
3.26	chr13	23855201	23856400	Hist1h1a	NM_030609	+	23855536
3.31	chr5	115605001	115606400
3.48	chr5	123600001	123601200
3.65	chr7	26032001	26033600
3.84	chr10	80641201	80643000
3.84	chr11	97640601	97642200
3.88	chr4	154028201	154030200
3.94	chr10	80393801	80394800	Gadd45b	NM_008655	+	80392835
4.37	chr17	31695001	31696000
4.48	chr4	128900601	128901800
4.48	chr8	124065401	124066800
4.99	chr10	81026601	81027600
6.67	chr4	138262401	138263400
7.36	chr5	114057401	114058400

## Sheet: Sheet1
Table S3. Genomic regions with differential H3K4me3 in menin-null vs WT mESCs (≥2-fold change)
Fold change	chrom	start	end	nearest_gene_or_locus	refseq_gene_ID	strand	TSS
-16.57	chr12	110779201	110780800	Meg3	NR_027652	+	110779205
-12.51	chr12	110765801	110767000
-8.71	chr6	30688001	30689000	Mest	NM_008590	+	30688062
-6.57	chr10	44160601	44161800
-5.21	chr12	111932601	111933800	Hsp90aa1	NM_010480	-	111934605
-2.87	chr4	33009201	33010200	Ankrd6	NM_080471	-	33010480
-2.61	chr8	122859601	122860600
-2.28	chr13	23523401	23524600
-2.25	chr4	34499001	34500000	Akirin2	NM_001007589	+	34497863
-2.16	chr8	107902801	107903800
-2.08	chr11	3066601	3068200
-2.06	chr19	36909601	36910600	Tnks2	NM_001163635	+	36908721
2	chr11	77306801	77308000	Git1	NM_001004144	+	77306913
2	chr7	19894201	19895200	Fosb	NM_008036	-	19895394
2.03	chr4	139801001	139803000	Igsf21	NM_198610	-	139802726
2.05	chr17	35186601	35187600
2.05	chr15	74785801	74787000	Ly6e	NM_001164040	+	74785535
2.06	chr7	148140001	148141600	Ifitm2	NM_030694	-	148141860
2.1	chr2	181326801	181327800
2.1	chr17	24826201	24827200	Syngr3	NM_011522	-	24826894
2.1	chr8	73289401	73290400	Ifi30	NM_023065	-	73290562
2.11	chr8	106965601	106966600	Dync1li2	NM_001013380	-	106966947
2.11	chr7	30092401	30093400
2.11	chr17	45737601	45738800	Gm7325	NM_001177470	-	45738864
2.14	chr17	88196401	88197400	Kcnk12	NM_199251	-	88197334
2.15	chr9	94437401	94438400	1190002N15Rik	NM_001033145	-	94438500
2.15	chr1	75501601	75502600	Obsl1	NM_178884	-	75503027
2.15	chr7	20407201	20408200	Bcl3	NM_033601	-	20408104
2.16	chr4	137951201	137952200	Fam43b	NM_001081672	-	137952373
2.16	chr8	116963401	116964600	Wwox	NM_019573	+	116963551
2.22	chr16	35659601	35660800
2.22	chr5	114933601	114936600
2.24	chr7	126137201	126138200	Gprc5b	NM_001195774	-	126138725
2.25	chr7	133838001	133839200	Slx1b	NM_029420	-	133839297
2.25	chr4	154009001	154011000	Prdm16	NM_001177995	-	154010982
2.27	chr7	20092401	20093400	Bloc1s3	NM_177692	-	20093680
2.32	chr2	130101801	130103000
2.4	chr13	98254801	98255800
2.47	chr8	124429601	124430800	Slc7a5	NM_011404	-	124431586
2.51	chr2	179709801	179711000	Taf4a	NM_001081092	-	179711351
2.56	chr19	5662801	5663800	Sipa1	NM_001164481	-	5663707
2.56	chr4	133188401	133189400	Zdhhc18	NM_001017968	-	133189344
2.56	chr7	51885001	51886000
2.58	chr19	45132801	45133800
2.64	chr2	10285201	10286400
2.64	chr7	31250801	31253200
2.73	chr14	47009801	47011000
2.8	chr17	30023801	30024800	Mdga1	NM_001081160	-	30024827
2.88	chr19	6999201	7000400	1700019N12Rik	NM_001039494	-	6999870
2.9	chr17	35972001	35973000
3.03	chr12	106460001	106461000	Tcl1	NM_009337	-	106460947
3.13	chr14	55191601	55192600
3.26	chr13	23855201	23856400	Hist1h1a	NM_030609	+	23855536
3.31	chr5	115605001	115606400
3.48	chr5	123600001	123601200
3.65	chr7	26032001	26033600
3.84	chr10	80641201	80643000
3.84	chr11	97640601	97642200
3.88	chr4	154028201	154030200
3.94	chr10	80393801	80394800	Gadd45b	NM_008655	+	80392835
4.37	chr17	31695001	31696000
4.48	chr4	128900601	128901800
4.48	chr8	124065401	124066800
4.99	chr10	81026601	81027600
6.67	chr4	138262401	138263400
7.36	chr5	114057401	114058400
