# Supplementary material for: Genome-Wide Characterization of Menin-Dependent H3K4me3 Reveals a Specific Role for Menin in the Regulation of Genes Implicated in MEN1-Like Tumors
Source: PLoS One. 2012 May 30;7(5):e37952. doi: 10.1371/journal.pone.0037952 (PMC3364203; doi:10.1371/journal.pone.0037952)
Supplement: Table S4 — Genomic regions with differential H3K4me3 in menin-null vs wild-type pancreatic islet-like endocrine cells. (XLSX) [file pone.0037952.s006.xlsx]

## Sheet: Table S3
Fold change	chromosome	start	end	nearest_gene_or_locus	refseq_gene_ID	strand	TSS
-19.63	chr11	96194001	96195200	Hoxb locus
-12.68	chr2	74551001	74553600	Hoxd locus	NR_027899	-	74554187
-11.54	chr11	96175201	96176800	Hoxb locus
-11.23	chr11	96186801	96191000	Hoxb locus
-10.38	chr11	96152801	96159200	Hoxb locus
-10.05	chr11	96209601	96210600	Hoxb locus
-9.12	chr11	96213201	96216000	Hoxb2	NM_134032	+	96212945
-8.89	chr11	96146801	96150200	Hoxb7	NM_010460	+	96147959
-8.63	chr6	52124801	52130000	Hoxa locus
-8.57	chr15	102802601	102804400	Hoxc locus
-8.42	chr11	96159801	96170600	Hoxb5	NM_008268	+	96164825
-8.19	chr6	52171801	52176000	Hoxa locus
-7.9	chr6	52161001	52163400	Hoxa3	NM_010452	-	52163066
-7.54	chr15	102812601	102814600	Hoxc locus
-7.02	chr11	96142601	96146400	Hoxb8	NM_010461	+	96143218
-6.95	chr6	52115201	52116400	Hoxa locus
-6.79	chr6	52182401	52184800	Hoxa10	NM_008263	-	52184938
-6.6	chr15	102827801	102829600	Hoxc locus
-6.33	chr11	96132801	96136200	Hoxb9	NM_008270	+	96132643
-6.24	chr15	102805401	102808400	Hoxc locus
-6.18	chr11	18774001	18775800
-6.13	chr11	96178801	96179800	Hoxb locus
-5.99	chr6	52113001	52114000	Hoxa2	NM_010451	-	52114830
-5.88	chr11	96180401	96182800	Hoxb locus
-5.88	chr15	102821001	102823200	Hoxc8	NM_010466	+	102820969
-5.81	chr15	102797401	102798800	Hoxc10	NM_010462	+	102797226
-5.65	chr5	28497401	28498400
-5.5	chr6	52158201	52159800	Hoxa locus
-5.47	chr11	18772001	18773000
-5.42	chr14	122848601	122849600	Gm5089	NR_033325	-	122850337
-5.36	chr15	102831001	102832800	Hoxc locus
-5.12	chr14	49289801	49291200	Otx2os1	NR_029384	+	49288962
-5.12	chr15	102810201	102811200	Hoxc locus
-4.97	chr9	35233201	35234400
-4.88	chr3	51873401	51874400
-4.84	chr2	28767201	28769400
-4.74	chr2	74549001	74550600	Hoxd locus
-4.59	chr16	77594401	77596200
-4.51	chr11	96172001	96174200	Hoxb locus
-4.44	chr15	72638401	72641000	Peg13	NR_002864	-	72640754
-4.24	chr14	49329001	49330200
-4.24	chr18	69510801	69512000
-4.18	chr6	136467201	136468400	Atf7ip	NM_019426	+	136467371
-4.13	chr16	77423001	77424000
-4.08	chr6	65623201	65624200
-4.08	chr9	62996001	62997200	Skor1	NM_001163758	-	62996768
-4.07	chr2	74542201	74545000	Hoxd8	NM_008276	+	74543545
-4.01	chr12	120473401	120474400
-4.01	chr15	103045801	103046800
-4.01	chr8	111232201	111233200
-3.95	chr11	8524001	8525400
-3.89	chr11	96201801	96204200	Hoxb locus
-3.89	chr9	56354001	56355200
-3.84	chr10	45188601	45189800	Lin28b	NM_001031772	-	45190007
-3.77	chr16	77238201	77240400
-3.77	chr3	115830201	115831200	Vcam1	NM_011693	-	115832606
-3.71	chrX	156426001	156427000	Map3k15	NM_001163085	+	156426364
-3.7	chr3	5210201	5212200
-3.61	chr4	45832001	45833200
-3.6	chr2	13493601	13494600
-3.6	chrX	12450401	12451400
-3.5	chr11	18912001	18913200
-3.36	chr3	86348401	86349400
-3.35	chr8	48325201	48326600
-3.34	chr14	122871401	122872600
-3.34	chr16	44530201	44531600
-3.33	chr11	103635201	103637200	Wnt3	NM_009521	+	103635488
-3.32	chr1	140731801	140735000
-3.3	chr12	27745801	27746800
-3.27	chr3	68378201	68379200
-3.23	chr5	22924601	22925600
-3.17	chr18	67366401	67367400	Chmp1b	NM_024190	+	67365012
-3.14	chr6	119493201	119494200	Wnt5b	NM_009525	-	119494365
-3.13	chr4	53792201	53793600	Tal2	NM_009317	+	53792576
-3.12	chr1	97560601	97561600
-3.11	chr9	15297401	15298400
-3.1	chr1	183770201	183771200	Lbr	NM_133815	-	183772532
-3.09	chr16	77236201	77237600
-3.08	chr4	44715201	44716400
-3.06	chr10	18189001	18190600	Nhsl1	NM_001163592	+	18189786
-3.06	chr19	45309601	45312400
-3.04	chr2	179710601	179711600	Taf4a	NM_001081092	-	179711351
-3.03	chr2	24329201	24330800	Pax8	NM_011040	-	24331086
-3.02	chr8	48327801	48329000
-3	chr10	91621801	91622800
-2.98	chr4	155578601	155579600	AW011738	NR_030671	+	155577392
-2.97	chr16	77502001	77504000
-2.96	chr3	51811401	51812400
-2.95	chr2	65770801	65771800
-2.93	chr11	20355201	20356200
-2.93	chr8	74000201	74001400
-2.89	chr11	96207001	96208200	Hoxb locus
-2.83	chr2	84264601	84265800	Calcrl	NM_018782	-	84265423
-2.83	chr4	45836001	45837200
-2.83	chr6	52108801	52111400
-2.81	chr16	77418601	77420200
-2.81	chr6	65728401	65729600	Prdm5	NM_027547	+	65728955
-2.8	chr15	83609801	83610800
-2.78	chr5	124804001	124805000	Cdk2ap1	NM_013812	-	124804637
-2.78	chr9	62990401	62991600
-2.75	chr1	180298601	180299800
-2.72	chr1	42741001	42742400
-2.72	chr7	34917201	34918400	Wtip	NM_207212	-	34918287
-2.72	chr9	91246201	91247400
-2.71	chr11	11936201	11937200	Grb10	NM_010345	-	11937423
-2.71	chrX	100818201	100819200	B230206F22Rik	NR_028381	-	100819093
-2.7	chr9	72381601	72382600
-2.68	chr3	51221201	51222200	Naa15	NM_053089	+	51219937
-2.66	chr10	52424201	52425200
-2.66	chr15	98814201	98816600
-2.66	chrX	146875001	146876000	Tmem29	NM_001164684	-	146875680
-2.63	chr10	36855601	36856600
-2.61	chr6	4550801	4551800	Casd1	NM_145398	+	4551065
-2.61	chr6	49162201	49163200
-2.6	chr14	115440201	115442200
-2.57	chr18	67770001	67771000
-2.56	chr18	84253001	84255200	Tshz1	NM_001081300	-	84255954
-2.55	chr14	112080401	112081400
-2.55	chr3	51848601	51850400
-2.55	chr4	82183001	82184800
-2.54	chr2	38679401	38681200
-2.52	chrX	8849201	8850200
-2.51	chr11	95864201	95866600	Igf2bp1	NM_009951	-	95867258
-2.5	chr14	55136201	55137400
-2.5	chr8	96695201	96696200
-2.5	chr9	35230001	35231400
-2.49	chr10	84222201	84223400
-2.49	chr19	10314601	10315600	Gm98	NM_001033481	-	10315238
-2.48	chr1	179375201	179376200	Zfp238	NM_001012330	+	179374791
-2.48	chr15	55138201	55139200
-2.48	chr3	21975201	21976200	Tbl1xr1	NM_030732	+	21975573
-2.48	chr4	43222001	43223000
-2.47	chr14	76818601	76819600
-2.47	chr18	33619601	33621200
-2.45	chr6	36757801	36759200
-2.43	chr11	77327401	77328600
-2.43	chr5	129107401	129109400	Fzd10	NM_175284	+	129106980
-2.43	chr8	91561201	91563800
-2.42	chr1	164149001	164150200	Dnm3os	NR_002870	+	164147753
-2.4	chr16	45722601	45723800	Tagln3	NM_019754	-	45724644
-2.4	chr3	83571201	83572200	Sfrp2	NM_009144	+	83570242
-2.37	chr16	38086801	38087800
-2.36	chr9	26999201	27000200
-2.31	chr15	96884801	96886200	Slc38a4	NM_027052	-	96886387
-2.3	chr2	106489801	106490800
-2.29	chr1	45369001	45370200	Col3a1	NM_009930	+	45368382
-2.29	chr14	55224001	55225000	4931414P19Rik	NM_028890	-	55224745
-2.29	chr3	130815401	130816400
-2.27	chr3	60331601	60332600
-2.27	chr9	59331601	59332600
-2.26	chr8	92871801	92873000
-2.25	chr13	6644201	6645600
-2.25	chr4	123249601	123250600
-2.25	chr5	93698601	93699600
-2.24	chr10	43198601	43200000	Bend3	NM_199028	+	43198945
-2.24	chr7	80697401	80701200
-2.23	chr3	141129401	141131400	Unc5c	NM_009472	+	141128527
-2.22	chr14	65879001	65880000	Fzd3	NM_021458	-	65881300
-2.22	chr18	21810001	21811200	Klhl14	NM_001081403	-	21810869
-2.21	chr17	69732001	69733200
-2.2	chr2	69660801	69662200	Klhl23	NM_177784	+	69660426
-2.2	chr3	137286401	137287600	Ddit4l	NM_030143	+	137286635
-2.2	chr3	132973001	132974200	Ppa2	NM_146141	+	132973079
-2.2	chr5	125655801	125656800
-2.19	chr5	3647401	3648600
-2.19	chr7	35436401	35437600	Kctd15	NM_146188	-	35437860
-2.18	chr17	9956801	9958200
-2.18	chr2	165421201	165422200
-2.17	chr14	49280601	49282000	Otx2	NM_144841	-	49282547
-2.17	chr15	81354201	81355200
-2.17	chr5	115643801	115644800
-2.17	chr9	71743001	71744200
-2.15	chr19	40969801	40970800	Zfp518a	NM_028319	+	40969194
-2.15	chr5	28501201	28502200
-2.15	chrX	75055801	75056800
-2.14	chr10	125404201	125406200	Lrig3	NM_177152	+	125403274
-2.14	chr10	62483801	62485200
-2.14	chr4	124334801	124335800	Pou3f1	NM_011141	+	124334888
-2.14	chr9	91278601	91279600
-2.12	chr1	92102601	92103600
-2.12	chr18	69751201	69752200
-2.11	chr1	191745801	191746800
-2.11	chr13	43576001	43577000
-2.11	chr6	52152801	52154600	Hoxa5	NM_010453	-	52154586
-2.1	chr2	38211201	38212200
-2.1	chr4	137262801	137263800
-2.08	chr14	45840801	45842200
-2.08	chr2	44970801	44972400
-2.08	chr9	74823401	74825000	BC031353	NM_153584	+	74823917
-2.06	chr5	52957201	52958200
-2.05	chr11	110028401	110029600	Abca9	NM_147220	-	110029467
-2.05	chr4	97424601	97425600
-2.05	chrX	97015801	97017200	Tmem28	NM_001081283	+	97016407
-2.04	chr5	97426401	97427400	Bmp2k	NM_080708	+	97426707
-2.03	chr4	11084401	11085400	Trp53inp1	NM_001199105	+	11083587
-2.03	chr6	71445001	71446200	Rnf103	NM_009543	+	71443887
-2.02	chr11	69508801	69509800	BC096441	NM_001034097	-	69509600
-2.01	chr10	29079801	29081000	Rnf146	NM_001110198	-	29082248
-2.01	chr12	3891201	3893400	Dnmt3a	NM_153743	+	3891743
-2.01	chr16	17210001	17211000
-2.01	chr3	157587201	157588200	Cth	NM_145953	-	157588027
-2	chr13	84486601	84487600
-2	chr3	84107401	84110000
-2	chr5	119009801	119010800
2.02	chr8	12385801	12387800	Gm5607	NR_027975	+	12385770
2.06	chr19	8326401	8327600
2.09	chr3	41359601	41360600	Phf17	NM_001130184	+	41359655
2.15	chr5	28791601	28793400	Shh	NM_009170	-	28793641
2.16	chr15	84494001	84495600
2.18	chr13	23390001	23391200
2.35	chr2	71374201	71375400	Dlx1as	NR_002854	-	71375948
2.35	chr4	154007801	154008800
2.4	chr11	3809801	3811200
2.47	chr6	6828201	6829600
2.54	chr12	20925801	20927400
2.75	chr11	78313201	78314800	Vtn	NM_011707	+	78312621
2.78	chr4	145163801	145164800
2.88	chr9	110646201	110647200
2.99	chr12	19294001	19295200
3.05	chr18	37424201	37425400	Pcdhb1	NM_053126	+	37424651
3.3	chr7	4863001	4865000
3.57	chr8	11309801	11311000
3.62	chr2	147865001	147866000
4.05	chr8	77398001	77399200	Isx	NM_027837	+	77397072
4.55	chr4	138262001	138263200
6.97	chrX	98989401	98990400
7.3	chr1	58271401	58272600

## Sheet: Sheet1
Table S4. Genomic regions with differential H3K4me3 in menin-null vs WT PILECs (>2-fold change)
Fold change	chrom	start	end	nearest_gene_or_locus	refseq_gene_ID	strand	TSS
-19.63	chr11	96194001	96195200	Hoxb locus
-12.68	chr2	74551001	74553600	Hoxd locus	NR_027899	-	74554187
-11.54	chr11	96175201	96176800	Hoxb locus
-11.23	chr11	96186801	96191000	Hoxb locus
-10.38	chr11	96152801	96159200	Hoxb locus
-10.05	chr11	96209601	96210600	Hoxb locus
-9.12	chr11	96213201	96216000	Hoxb2	NM_134032	+	96212945
-8.89	chr11	96146801	96150200	Hoxb7	NM_010460	+	96147959
-8.63	chr6	52124801	52130000	Hoxa locus
-8.57	chr15	102802601	102804400	Hoxc locus
-8.42	chr11	96159801	96170600	Hoxb5	NM_008268	+	96164825
-8.19	chr6	52171801	52176000	Hoxa locus
-7.9	chr6	52161001	52163400	Hoxa3	NM_010452	-	52163066
-7.54	chr15	102812601	102814600	Hoxc locus
-7.02	chr11	96142601	96146400	Hoxb8	NM_010461	+	96143218
-6.95	chr6	52115201	52116400	Hoxa locus
-6.79	chr6	52182401	52184800	Hoxa10	NM_008263	-	52184938
-6.6	chr15	102827801	102829600	Hoxc locus
-6.33	chr11	96132801	96136200	Hoxb9	NM_008270	+	96132643
-6.24	chr15	102805401	102808400	Hoxc locus
-6.18	chr11	18774001	18775800
-6.13	chr11	96178801	96179800	Hoxb locus
-5.99	chr6	52113001	52114000	Hoxa2	NM_010451	-	52114830
-5.88	chr11	96180401	96182800	Hoxb locus
-5.88	chr15	102821001	102823200	Hoxc8	NM_010466	+	102820969
-5.81	chr15	102797401	102798800	Hoxc10	NM_010462	+	102797226
-5.65	chr5	28497401	28498400
-5.5	chr6	52158201	52159800	Hoxa locus
-5.47	chr11	18772001	18773000
-5.42	chr14	122848601	122849600	Gm5089	NR_033325	-	122850337
-5.36	chr15	102831001	102832800	Hoxc locus
-5.12	chr14	49289801	49291200	Otx2os1	NR_029384	+	49288962
-5.12	chr15	102810201	102811200	Hoxc locus
-4.97	chr9	35233201	35234400
-4.88	chr3	51873401	51874400
-4.84	chr2	28767201	28769400
-4.74	chr2	74549001	74550600	Hoxd locus
-4.59	chr16	77594401	77596200
-4.51	chr11	96172001	96174200	Hoxb locus
-4.44	chr15	72638401	72641000	Peg13	NR_002864	-	72640754
-4.24	chr14	49329001	49330200
-4.24	chr18	69510801	69512000
-4.18	chr6	136467201	136468400	Atf7ip	NM_019426	+	136467371
-4.13	chr16	77423001	77424000
-4.08	chr6	65623201	65624200
-4.08	chr9	62996001	62997200	Skor1	NM_001163758	-	62996768
-4.07	chr2	74542201	74545000	Hoxd8	NM_008276	+	74543545
-4.01	chr12	120473401	120474400
-4.01	chr15	103045801	103046800
-4.01	chr8	111232201	111233200
-3.95	chr11	8524001	8525400
-3.89	chr11	96201801	96204200	Hoxb locus
-3.89	chr9	56354001	56355200
-3.84	chr10	45188601	45189800	Lin28b	NM_001031772	-	45190007
-3.77	chr16	77238201	77240400
-3.77	chr3	115830201	115831200	Vcam1	NM_011693	-	115832606
-3.71	chrX	156426001	156427000	Map3k15	NM_001163085	+	156426364
-3.7	chr3	5210201	5212200
-3.61	chr4	45832001	45833200
-3.6	chr2	13493601	13494600
-3.6	chrX	12450401	12451400
-3.5	chr11	18912001	18913200
-3.36	chr3	86348401	86349400
-3.35	chr8	48325201	48326600
-3.34	chr14	122871401	122872600
-3.34	chr16	44530201	44531600
-3.33	chr11	103635201	103637200	Wnt3	NM_009521	+	103635488
-3.32	chr1	140731801	140735000
-3.3	chr12	27745801	27746800
-3.27	chr3	68378201	68379200
-3.23	chr5	22924601	22925600
-3.17	chr18	67366401	67367400	Chmp1b	NM_024190	+	67365012
-3.14	chr6	119493201	119494200	Wnt5b	NM_009525	-	119494365
-3.13	chr4	53792201	53793600	Tal2	NM_009317	+	53792576
-3.12	chr1	97560601	97561600
-3.11	chr9	15297401	15298400
-3.1	chr1	183770201	183771200	Lbr	NM_133815	-	183772532
-3.09	chr16	77236201	77237600
-3.08	chr4	44715201	44716400
-3.06	chr10	18189001	18190600	Nhsl1	NM_001163592	+	18189786
-3.06	chr19	45309601	45312400
-3.04	chr2	179710601	179711600	Taf4a	NM_001081092	-	179711351
-3.03	chr2	24329201	24330800	Pax8	NM_011040	-	24331086
-3.02	chr8	48327801	48329000
-3	chr10	91621801	91622800
-2.98	chr4	155578601	155579600	AW011738	NR_030671	+	155577392
-2.97	chr16	77502001	77504000
-2.96	chr3	51811401	51812400
-2.95	chr2	65770801	65771800
-2.93	chr11	20355201	20356200
-2.93	chr8	74000201	74001400
-2.89	chr11	96207001	96208200	Hoxb locus
-2.83	chr2	84264601	84265800	Calcrl	NM_018782	-	84265423
-2.83	chr4	45836001	45837200
-2.83	chr6	52108801	52111400
-2.81	chr16	77418601	77420200
-2.81	chr6	65728401	65729600	Prdm5	NM_027547	+	65728955
-2.8	chr15	83609801	83610800
-2.78	chr5	124804001	124805000	Cdk2ap1	NM_013812	-	124804637
-2.78	chr9	62990401	62991600
-2.75	chr1	180298601	180299800
-2.72	chr1	42741001	42742400
-2.72	chr7	34917201	34918400	Wtip	NM_207212	-	34918287
-2.72	chr9	91246201	91247400
-2.71	chr11	11936201	11937200	Grb10	NM_010345	-	11937423
-2.71	chrX	100818201	100819200	B230206F22Rik	NR_028381	-	100819093
-2.7	chr9	72381601	72382600
-2.68	chr3	51221201	51222200	Naa15	NM_053089	+	51219937
-2.66	chr10	52424201	52425200
-2.66	chr15	98814201	98816600
-2.66	chrX	146875001	146876000	Tmem29	NM_001164684	-	146875680
-2.63	chr10	36855601	36856600
-2.61	chr6	4550801	4551800	Casd1	NM_145398	+	4551065
-2.61	chr6	49162201	49163200
-2.6	chr14	115440201	115442200
-2.57	chr18	67770001	67771000
-2.56	chr18	84253001	84255200	Tshz1	NM_001081300	-	84255954
-2.55	chr14	112080401	112081400
-2.55	chr3	51848601	51850400
-2.55	chr4	82183001	82184800
-2.54	chr2	38679401	38681200
-2.52	chrX	8849201	8850200
-2.51	chr11	95864201	95866600	Igf2bp1	NM_009951	-	95867258
-2.5	chr14	55136201	55137400
-2.5	chr8	96695201	96696200
-2.5	chr9	35230001	35231400
-2.49	chr10	84222201	84223400
-2.49	chr19	10314601	10315600	Gm98	NM_001033481	-	10315238
-2.48	chr1	179375201	179376200	Zfp238	NM_001012330	+	179374791
-2.48	chr15	55138201	55139200
-2.48	chr3	21975201	21976200	Tbl1xr1	NM_030732	+	21975573
-2.48	chr4	43222001	43223000
-2.47	chr14	76818601	76819600
-2.47	chr18	33619601	33621200
-2.45	chr6	36757801	36759200
-2.43	chr11	77327401	77328600
-2.43	chr5	129107401	129109400	Fzd10	NM_175284	+	129106980
-2.43	chr8	91561201	91563800
-2.42	chr1	164149001	164150200	Dnm3os	NR_002870	+	164147753
-2.4	chr16	45722601	45723800	Tagln3	NM_019754	-	45724644
-2.4	chr3	83571201	83572200	Sfrp2	NM_009144	+	83570242
-2.37	chr16	38086801	38087800
-2.36	chr9	26999201	27000200
-2.31	chr15	96884801	96886200	Slc38a4	NM_027052	-	96886387
-2.3	chr2	106489801	106490800
-2.29	chr1	45369001	45370200	Col3a1	NM_009930	+	45368382
-2.29	chr14	55224001	55225000	4931414P19Rik	NM_028890	-	55224745
-2.29	chr3	130815401	130816400
-2.27	chr3	60331601	60332600
-2.27	chr9	59331601	59332600
-2.26	chr8	92871801	92873000
-2.25	chr13	6644201	6645600
-2.25	chr4	123249601	123250600
-2.25	chr5	93698601	93699600
-2.24	chr10	43198601	43200000	Bend3	NM_199028	+	43198945
-2.24	chr7	80697401	80701200
-2.23	chr3	141129401	141131400	Unc5c	NM_009472	+	141128527
-2.22	chr14	65879001	65880000	Fzd3	NM_021458	-	65881300
-2.22	chr18	21810001	21811200	Klhl14	NM_001081403	-	21810869
-2.21	chr17	69732001	69733200
-2.2	chr2	69660801	69662200	Klhl23	NM_177784	+	69660426
-2.2	chr3	137286401	137287600	Ddit4l	NM_030143	+	137286635
-2.2	chr3	132973001	132974200	Ppa2	NM_146141	+	132973079
-2.2	chr5	125655801	125656800
-2.19	chr5	3647401	3648600
-2.19	chr7	35436401	35437600	Kctd15	NM_146188	-	35437860
-2.18	chr17	9956801	9958200
-2.18	chr2	165421201	165422200
-2.17	chr14	49280601	49282000	Otx2	NM_144841	-	49282547
-2.17	chr15	81354201	81355200
-2.17	chr5	115643801	115644800
-2.17	chr9	71743001	71744200
-2.15	chr19	40969801	40970800	Zfp518a	NM_028319	+	40969194
-2.15	chr5	28501201	28502200
-2.15	chrX	75055801	75056800
-2.14	chr10	125404201	125406200	Lrig3	NM_177152	+	125403274
-2.14	chr10	62483801	62485200
-2.14	chr4	124334801	124335800	Pou3f1	NM_011141	+	124334888
-2.14	chr9	91278601	91279600
-2.12	chr1	92102601	92103600
-2.12	chr18	69751201	69752200
-2.11	chr1	191745801	191746800
-2.11	chr13	43576001	43577000
-2.11	chr6	52152801	52154600	Hoxa5	NM_010453	-	52154586
-2.1	chr2	38211201	38212200
-2.1	chr4	137262801	137263800
-2.08	chr14	45840801	45842200
-2.08	chr2	44970801	44972400
-2.08	chr9	74823401	74825000	BC031353	NM_153584	+	74823917
-2.06	chr5	52957201	52958200
-2.05	chr11	110028401	110029600	Abca9	NM_147220	-	110029467
-2.05	chr4	97424601	97425600
-2.05	chrX	97015801	97017200	Tmem28	NM_001081283	+	97016407
-2.04	chr5	97426401	97427400	Bmp2k	NM_080708	+	97426707
-2.03	chr4	11084401	11085400	Trp53inp1	NM_001199105	+	11083587
-2.03	chr6	71445001	71446200	Rnf103	NM_009543	+	71443887
-2.02	chr11	69508801	69509800	BC096441	NM_001034097	-	69509600
-2.01	chr10	29079801	29081000	Rnf146	NM_001110198	-	29082248
-2.01	chr12	3891201	3893400	Dnmt3a	NM_153743	+	3891743
-2.01	chr16	17210001	17211000
-2.01	chr3	157587201	157588200	Cth	NM_145953	-	157588027
-2	chr13	84486601	84487600
-2	chr3	84107401	84110000
-2	chr5	119009801	119010800
2.02	chr8	12385801	12387800	Gm5607	NR_027975	+	12385770
2.06	chr19	8326401	8327600
2.09	chr3	41359601	41360600	Phf17	NM_001130184	+	41359655
2.15	chr5	28791601	28793400	Shh	NM_009170	-	28793641
2.16	chr15	84494001	84495600
2.18	chr13	23390001	23391200
2.35	chr2	71374201	71375400	Dlx1as	NR_002854	-	71375948
2.35	chr4	154007801	154008800
2.4	chr11	3809801	3811200
2.47	chr6	6828201	6829600
2.54	chr12	20925801	20927400
2.75	chr11	78313201	78314800	Vtn	NM_011707	+	78312621
2.78	chr4	145163801	145164800
2.88	chr9	110646201	110647200
2.99	chr12	19294001	19295200
3.05	chr18	37424201	37425400	Pcdhb1	NM_053126	+	37424651
3.3	chr7	4863001	4865000
3.57	chr8	11309801	11311000
3.62	chr2	147865001	147866000
4.05	chr8	77398001	77399200	Isx	NM_027837	+	77397072
4.55	chr4	138262001	138263200
6.97	chrX	98989401	98990400
7.3	chr1	58271401	58272600
